# Supplementary material
Source: PubMed Central journal article supplement (PMC2383975)
Supplement: 0800019105_Supplemental_PDF.pdf [file 0800019105_Supplemental_PDF.pdf]

# Supporting Information

Banci et al. 10.1073/pnas.0800019105

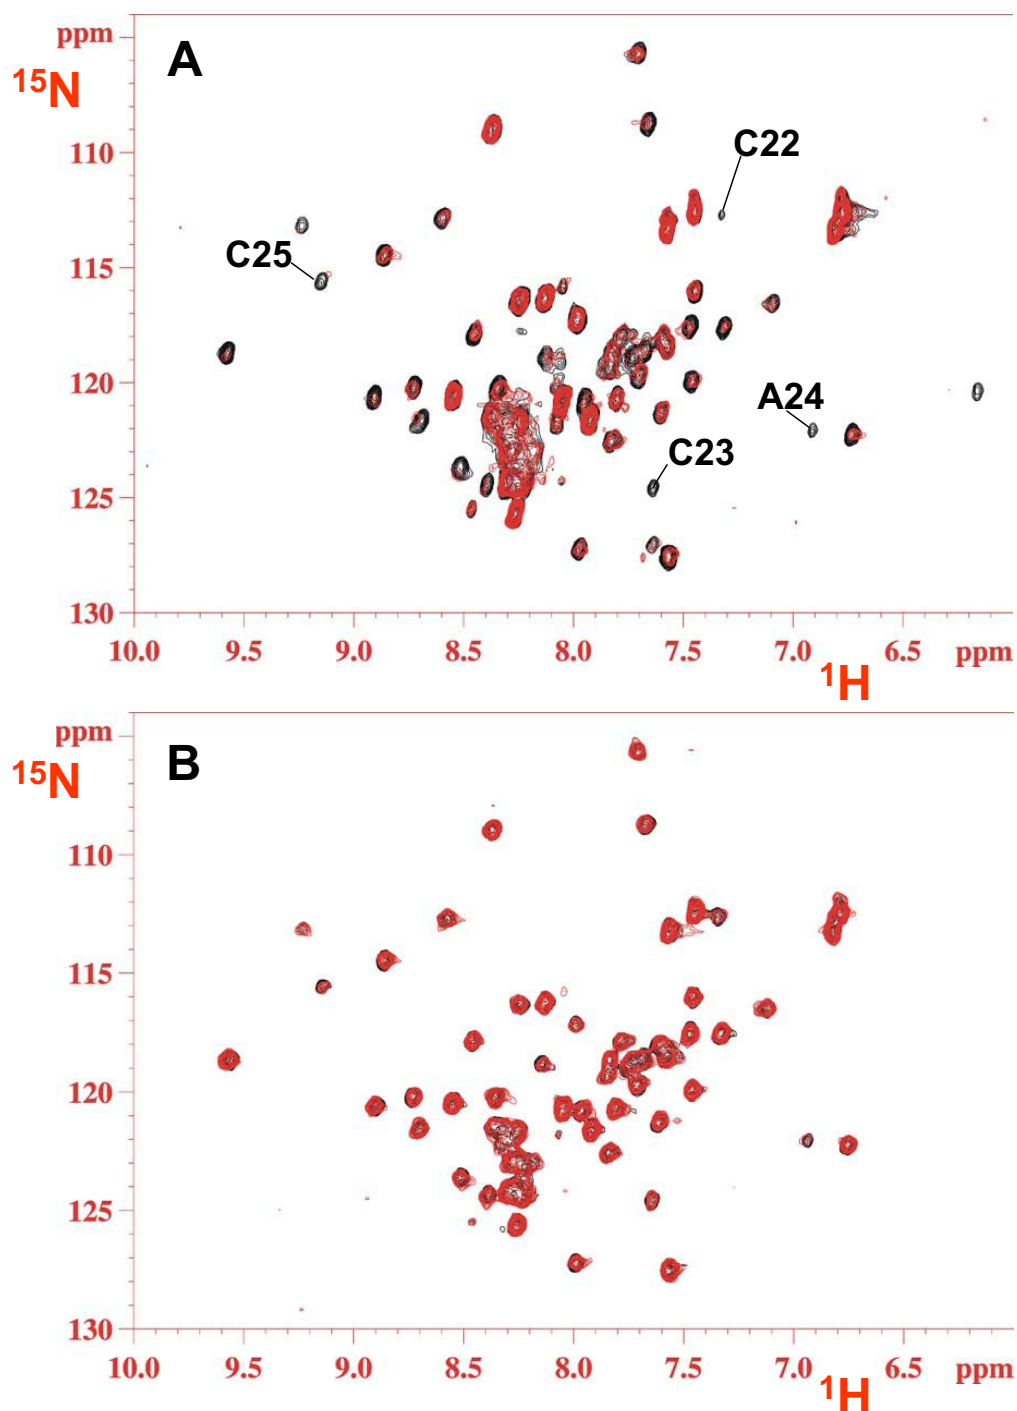

**Fig. S1.** Titration of  $^{15}\text{N}$ -labeled  $\text{Cu(I)HCox17}_{25.5}$  with unlabeled  $\text{HScO1}_{15.5}$  (A) or with unlabeled  $\text{HScO2}_{15.5}$  (B) followed through  $^1\text{H}$ - $^{15}\text{N}$  HSQC NMR spectra. The  $^1\text{H}$ - $^{15}\text{N}$  HSQC spectrum of  $\text{Cu(I)HCox17}_{25.5}$  (in black) is overlaid with the  $^1\text{H}$ - $^{15}\text{N}$  HSQC spectrum of a 1:1  $\text{HScO1}_{15.5}/\text{Cu(I)HCox17}_{25.5}$  mixture (A, in red) or with that of 1:1  $\text{HScO2}_{15.5}/\text{Cu(I)HCox17}_{25.5}$  mixture (B, in red). Copper(I)-binding ligands, C22 and C23, and the following residues, A24 and C25, broaden beyond detection upon addition of  $\text{HScO1}_{15.5}$ . On the contrary, upon addition of  $\text{HScO2}_{15.5}$  the  $\text{Cu(I)HCox17}_{25.5}$   $^1\text{H}$ - $^{15}\text{N}$  HSQC spectrum does not change.

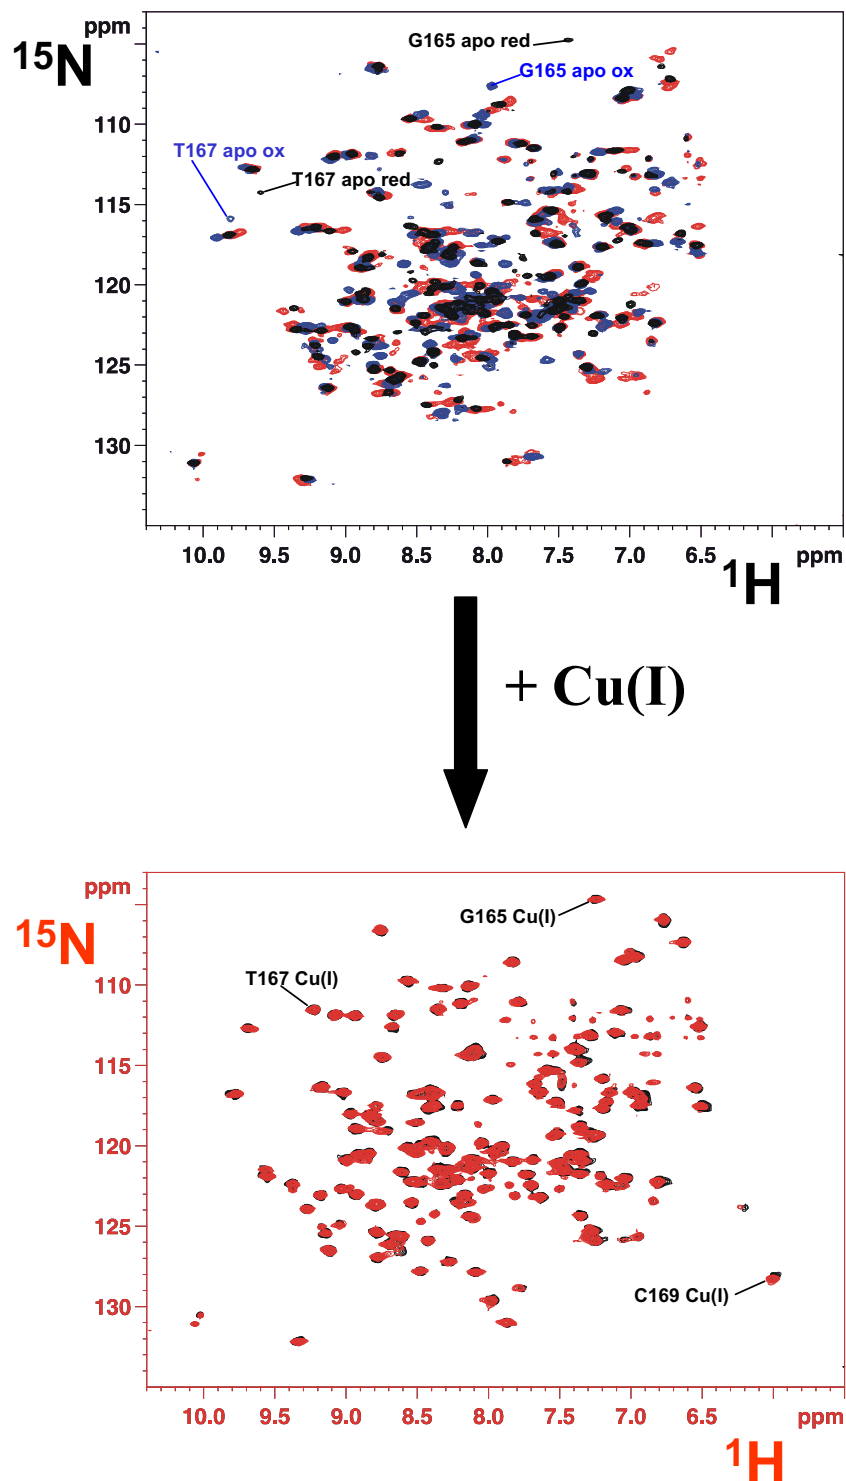

**Fig. S2.** Titration of  $^{15}\text{N}$ -labeled apoHSCO1<sub>15-5</sub> with unlabeled apoHCO1<sub>17-5</sub> followed through  $^1\text{H}$ - $^{15}\text{N}$  HSQC NMR spectra.  $^1\text{H}$ - $^{15}\text{N}$  HSQC spectrum of  $^{15}\text{N}$ -labeled apoHSCO1<sub>15-5</sub> (in blue) is overlaid with the  $^1\text{H}$ - $^{15}\text{N}$  HSQC spectrum of a 1:1  $^{15}\text{N}$ -labeled apoHSCO1<sub>15-5</sub>/unlabeled Cu(I)HCO1<sub>17-5</sub> mixture (in red) and with  $^1\text{H}$ - $^{15}\text{N}$  HSQC spectrum of  $^{15}\text{N}$ -labeled HSCO1<sub>25H</sub> (in black). Upon addition of 1 eq of Cu(I), the  $^1\text{H}$ - $^{15}\text{N}$  HSQC spectrum of the previous protein mixture drastically changes, becoming completely superimposable with the  $^1\text{H}$ - $^{15}\text{N}$  HSQC spectrum obtained by mixing  $^{15}\text{N}$ -labeled apoHSCO1<sub>15-5</sub> with unlabeled Cu(I)HCO1<sub>17-5</sub>. The assignment of the NH resonances of G165 and T167 in Cu(I)HSCO1, oxidized and reduced apoHSCO1 forms, is reported. The NH resonance of C169 is detected only in the copper(I)-bound form.

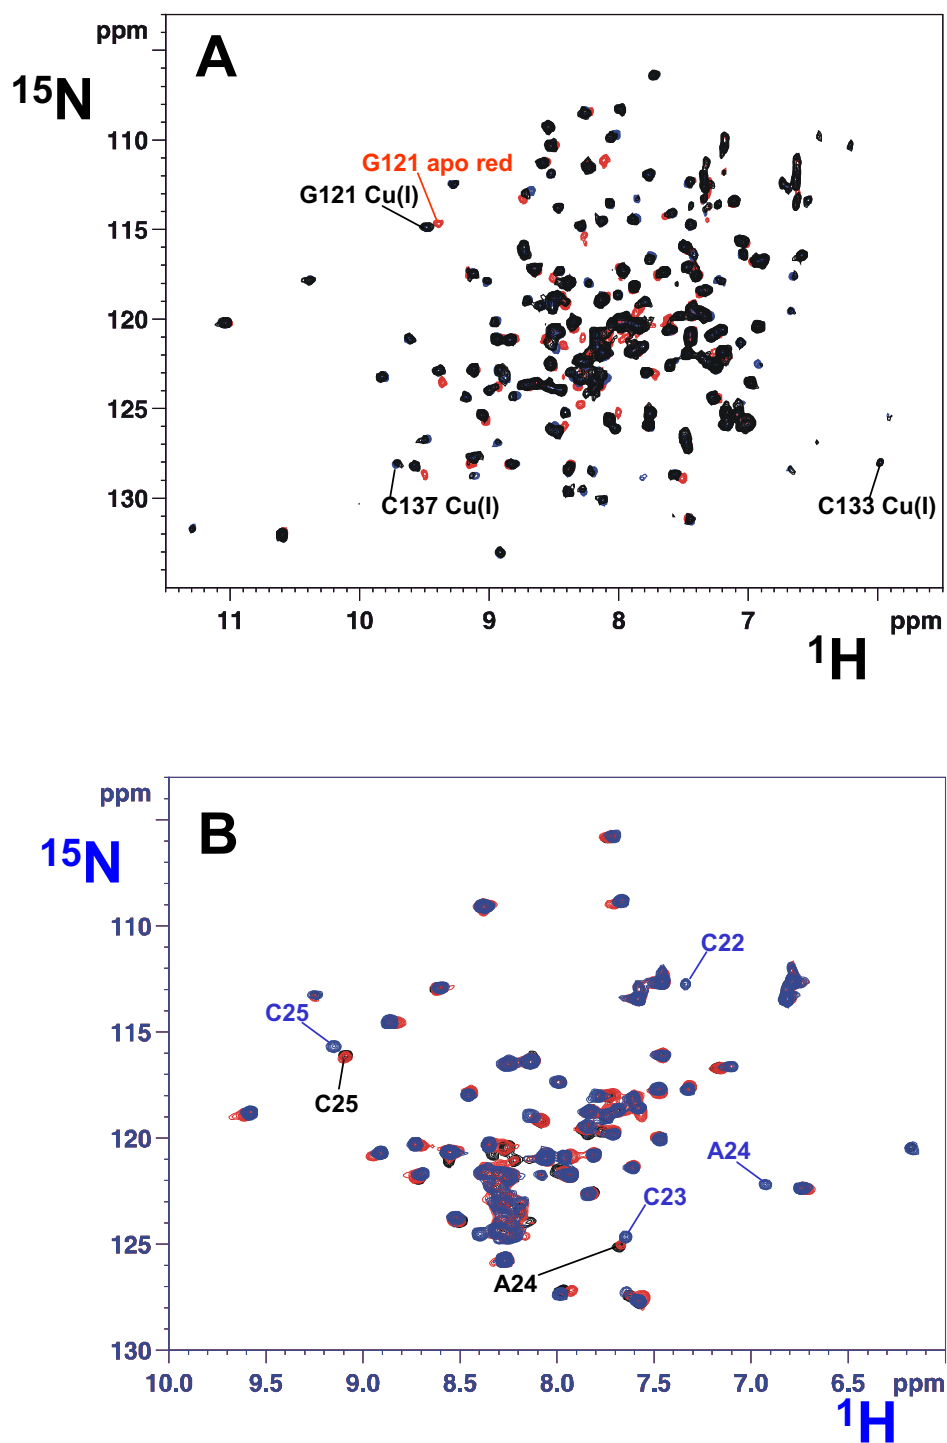

**Fig. S3.** Titration of  $^{15}\text{N}$ -labeled apoHSCO<sub>25H</sub> with unlabeled Cu(I)HCox17<sub>25-5</sub> (A) and of  $^{15}\text{N}$ -labeled Cu(I)HCox17<sub>25-5</sub> with unlabeled apoHSCO<sub>25H</sub> (B), followed by  $^1\text{H}$ - $^{15}\text{N}$  HSQC NMR spectra. The  $^1\text{H}$ - $^{15}\text{N}$  HSQC spectrum of apoHSCO<sub>25H</sub> (in red) is superimposed with the  $^1\text{H}$ - $^{15}\text{N}$  HSQC spectrum of a 1:1  $^{15}\text{N}$ -labeled HSCO<sub>25H</sub>/unlabeled Cu(I)HCox17<sub>25-5</sub> mixture (in blue) and with the  $^1\text{H}$ - $^{15}\text{N}$  HSQC spectrum of  $^{15}\text{N}$ -labeled Cu(I)HSCO<sub>2</sub> (in black). The assignment of the NH resonances of C137, C133 and G121 in Cu(I)HSCO<sub>2</sub> and apoHSCO<sub>25H</sub> forms, when detectable, is reported. In panel (B),  $^1\text{H}$ - $^{15}\text{N}$  HSQC spectrum of Cu(I)HCox17<sub>25-5</sub> (in blue) is superimposed with  $^1\text{H}$ - $^{15}\text{N}$  HSQC spectrum of a 1:1 mixture of  $^{15}\text{N}$ -labeled Cu(I)HCox17<sub>25-5</sub>/unlabeled HSCO<sub>25H</sub> (in red) and with the  $^1\text{H}$ - $^{15}\text{N}$  HSQC spectrum of apoHCox17<sub>25-5</sub> (in black). The assignment of the NH resonances of A24 and C25 in Cu(I)HCox17<sub>25-5</sub> and apoHCox17<sub>25-5</sub> forms is reported. The NH resonances of C22 and C23 are detected only in the copper(I)-bound form.

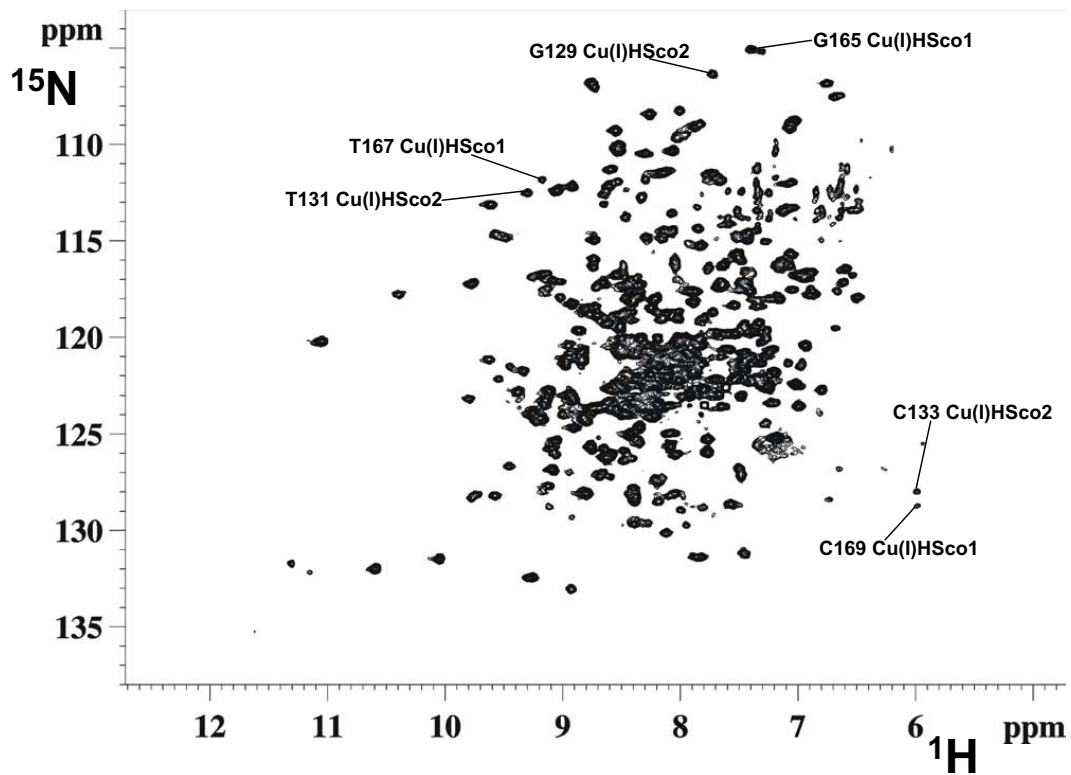

**Fig. S4.** Titration of a 1:1  $^{15}\text{N}$  apoHSc1<sub>25H</sub>/ $^{15}\text{N}$  apoHSc2<sub>25H</sub> mixture with copper(I) ion followed through  $^1\text{H}$ - $^{15}\text{N}$  HSQC NMR spectra. The  $^1\text{H}$ - $^{15}\text{N}$  HSQC spectrum of the protein mixture after addition of 1 eq of copper(I) acetonitrile complex is shown. NH resonances of some residues whose chemical shift is typical of the copper forms of HSc1 and HSc2 are indicated.
